# Supplementary material
Source: Elsevier journal article supplement (https://www.sciencedirect.com/science/article/pii/S0187533718301055)
Supplement: mmc1 [file S0187533718301055:mmc1.docx]

**ANEXO 1: ALGORITMO DIAGNOSTICO DE COLESTASIS INTRAHEPÁTICA**

**NO**

**SI**
