# Supplementary material
Source: Elsevier journal article supplement (https://www.sciencedirect.com/science/article/pii/S0187533718301055)
Supplement: mmc2 [file S0187533718301055:mmc2.docx]

**ANEXO 2: ALGORITMO PARA DECIDIR EL MOMENTO DEL NACIMIENTO**

*LA VÍA DEPENDE DE LAS CONDICIONES OBSTÉTRICAS

LA

**SI**
